# Supplementary material
Source: Elsevier journal article supplement (https://rcastoragev2.blob.core.windows.net/5411d55e6c1792512cd8dc49f6f2609e/mmc1.pdf)
Supplement: mmc1 [file mmc1.pdf]

**Supplemental Information**

**Molecular Profiling and Functional Analysis  
of Macrophage-Derived Tumor Extracellular Vesicles**

**Chiara Ciciaruso, Tim Beltraminelli, Florent Duval, Sina Nassiri, Romain Hamelin, André Mozes, Hector Gallart-Ayala, Gerardo Ceada Torres, Bruno Torchia, Carola H. Ries, Julijana Ivanisevic, and Michele De Palma**

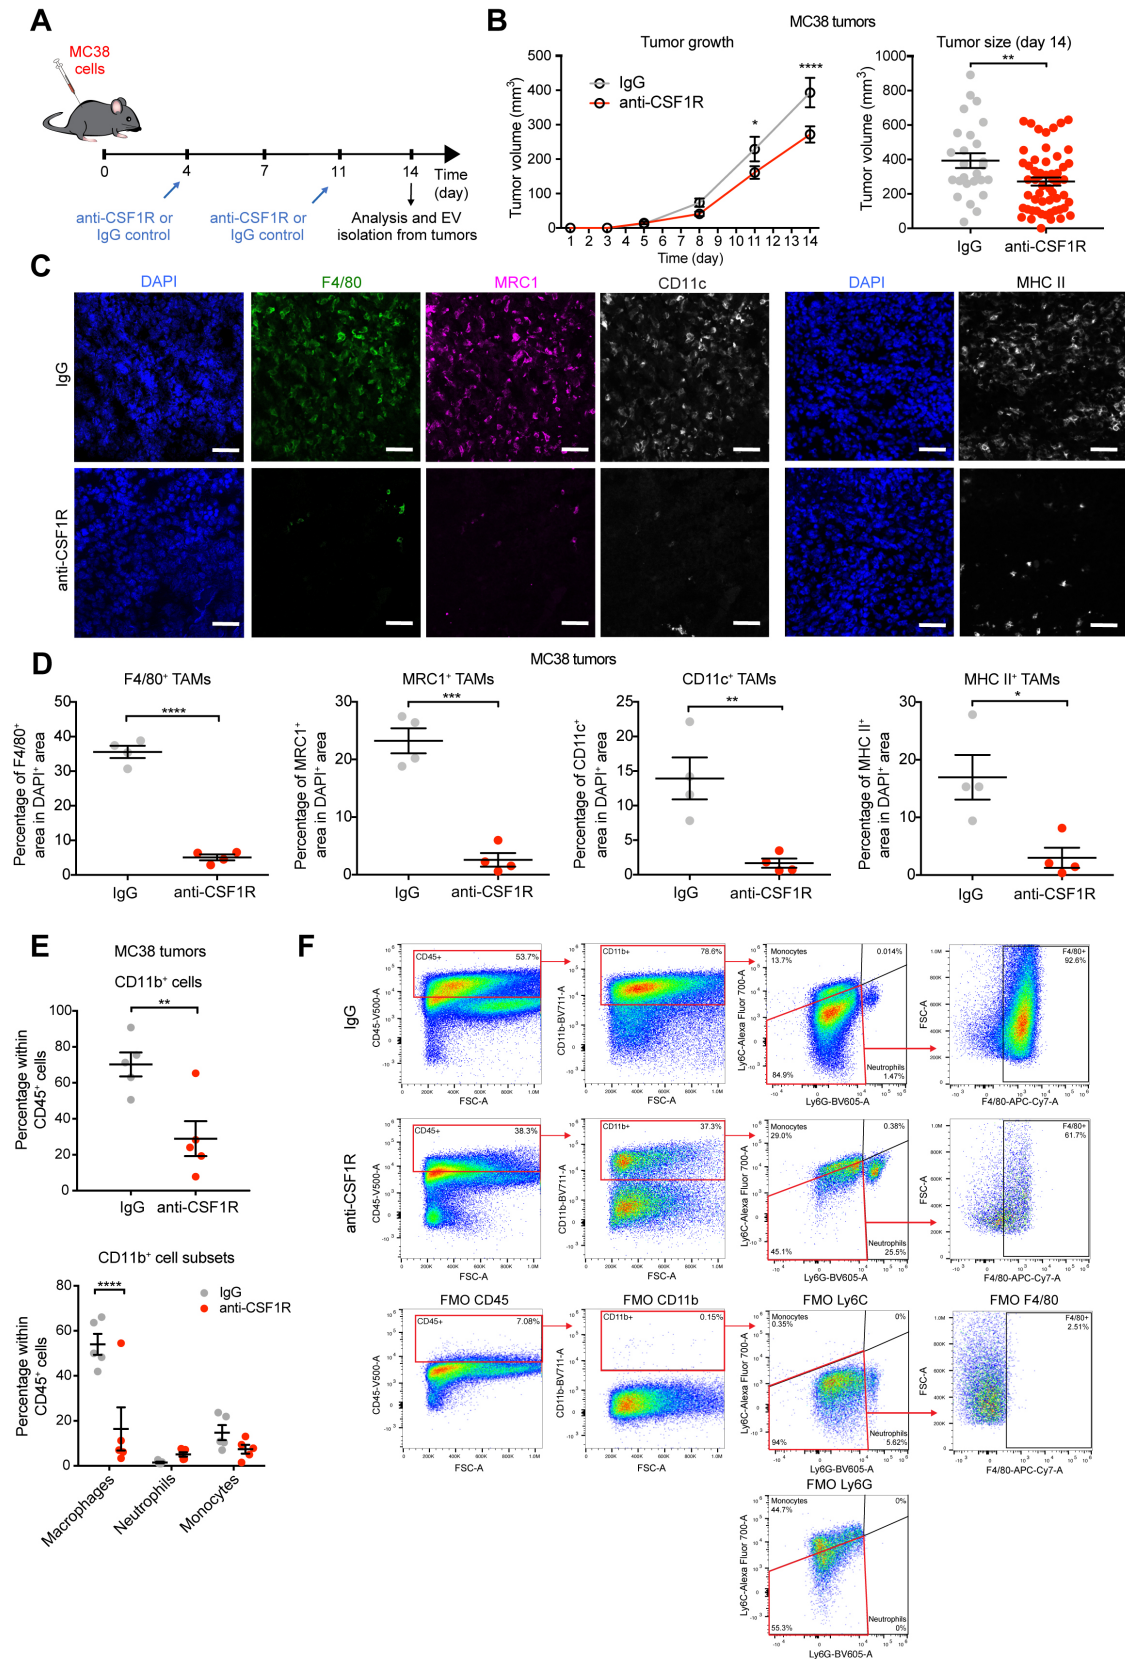

**Figure S1. Depletion of macrophages in MC38 tumors by CSF1R blockade, Related to Figure 1**

**A)** Schedule of subcutaneous MC38 cancer cell inoculation and drug administration in C57BL/6 mice.

**B)** MC38 tumor growth. Left panel shows data as tumor volume (mean  $\pm$  s.e.m.;  $n=26-55$  mice/condition, from 5 independent experiments combined) at different time-points of analysis. Statistics by two-way ANOVA, using Sidak's multiple comparison test. Right panel shows tumor volume (mean  $\pm$  s.e.m.) of the same mice at the end

of the experiment (day 14). Statistics by unpaired two-tailed Student's t-test.

**C-D)** Immunostaining analysis of macrophage proteins on MC38 tumor sections. Panels (C) show representative immunostaining images. Nuclei are stained with DAPI (blue). Scale bar, 50  $\mu$ m. Panels (D) show quantitative analysis of marker-positive area relative to DAPI-positive area (mean  $\pm$  s.e.m.; n=4 mice/condition; 5 randomly selected images per section). Statistics by unpaired two-tailed Student's t-test.

**E)** Flow cytometry analysis of myeloid cells in MC38 tumors. Upper panel shows the percentage of CD11b<sup>+</sup> myeloid cells within CD45<sup>+</sup> hematopoietic cells. Lower panel shows individual myeloid cell types. Data show percentage values (mean  $\pm$  s.e.m.; n=5 mice/condition). Statistics by unpaired two-tailed Student's t-test (upper panel) and two-way ANOVA, using Sidak's multiple comparison test (lower panel).

**F)** Representative flow cytometry plots of MC38 tumors showing the gating strategy employed to identify the myeloid-cell populations in (E). FMO, fluorescence minus one (unstained).

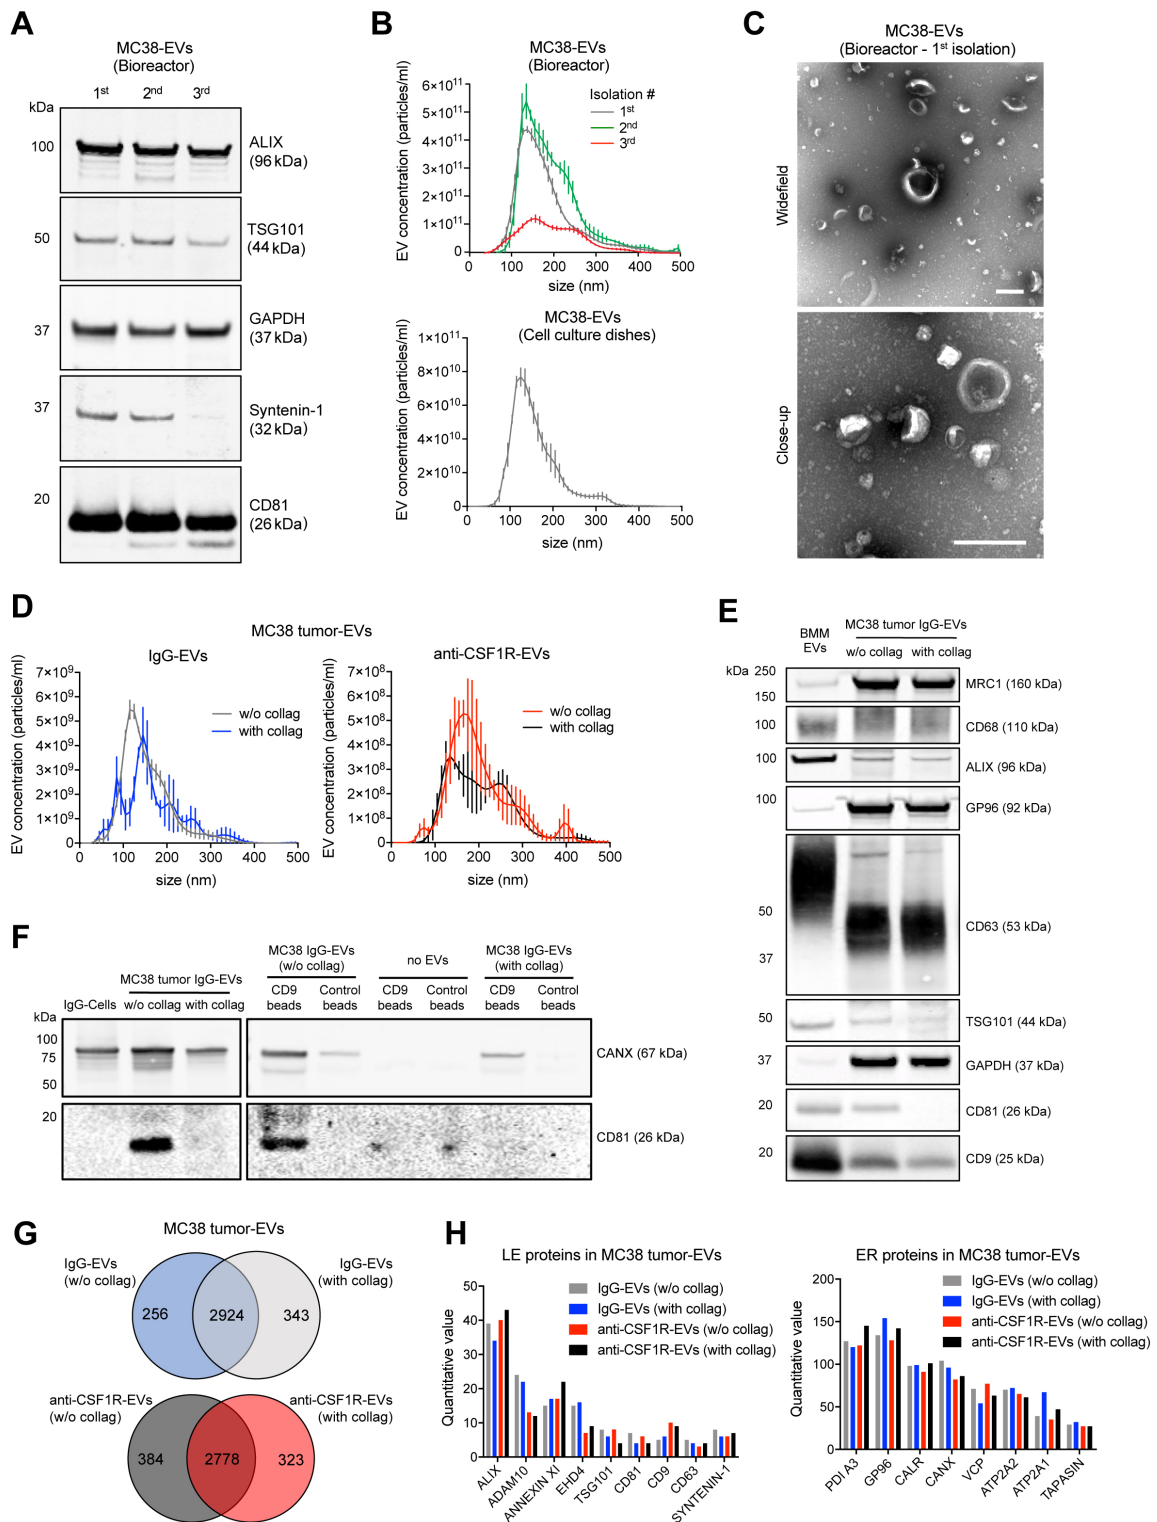

**Figure S2. Isolation of EVs from cultured MC38 cells or MC38 tumors, Related to Figure 1**

**A)** WB analysis of three consecutive EV isolations (7 days apart) from MC38 cells cultured in a bioreactor flask.

**B)** Concentration and size distribution by NTA (mean  $\pm$  s.e.m.;  $n=3$  acquisitions/sample) of EVs isolated from MC38 cells that were cultured in a bioreactor flask (upper panel) or in standard tissue culture dishes (lower panel). One representative EV preparation per condition is shown.

**C)** TEM images of EVs from MC38 cells cultured in a bioreactor flask. One representative EV preparation per condition is shown. Scale bar, 200 nm.

**D)** Concentration and size distribution by NTA (mean  $\pm$  s.e.m.;  $n=3$  acquisitions/sample) of MC38 tumor-derived IgG-EVs and anti-CSF1R-EVs, extracted with or without (w/o) collagenase. One representative EV



preparation per condition is shown.

**E)** WB analysis of M2 BMM-EVs and tumor-derived IgG-EVs. One representative EV preparation per condition is shown.

**F)** WB analysis of tumor-derived cells (IgG-Cells) and IgG-EVs immunoprecipitated with anti-CD9 or control-coated magnetic beads. One representative EV preparation per condition is shown.

**G)** Venn diagrams comparing proteins detected by LC-MS/MS analysis in IgG-EVs (upper panel) and anti-CSF1R-EVs (lower panel).

**H)** LC-MS/MS analysis of IgG-EVs and anti-CSF1R-EVs showing proteins identified according to their association with late endosomes (LE, left panel) or endoplasmic reticulum (ER, right panel).

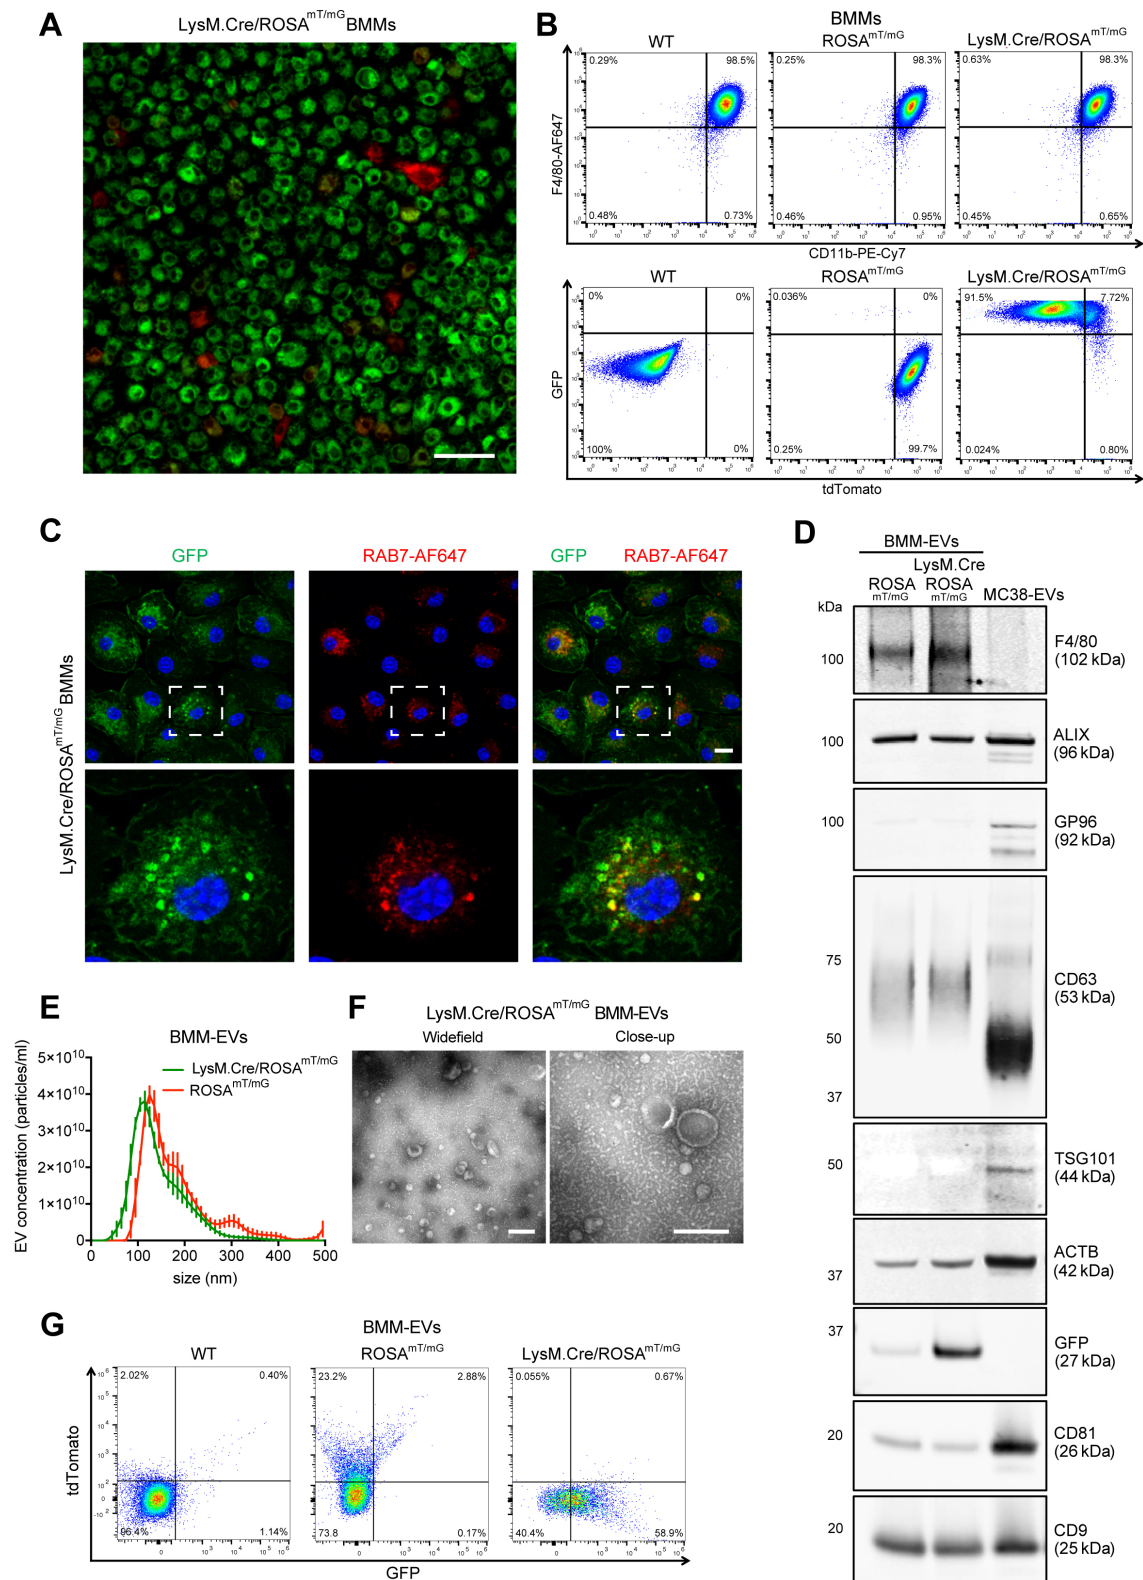

**Figure S3. Isolation and characterization of EVs from LysM.Cre/ROSA<sup>mT/mG</sup> BMMs, Related to Figure 4**

**A)** Live cell confocal imaging of cultured BMMs from LysM.Cre/ROSA<sup>mT/mG</sup> mice. Scale bar, 50  $\mu$ m.

**B)** Flow cytometry analysis of BMMs isolated from wild-type (WT), ROSA<sup>mT/mG</sup> or LysM.Cre/ROSA<sup>mT/mG</sup> mice. Representative dot plots show expression of F4/80 and CD11b (upper panels) and GFP and tdTomato (lower panels).

**C)** Representative confocal images of LysM.Cre/ROSA<sup>mT/mG</sup> BMMs immunostained for the late endosome antigen RAB7 (red). GFP was detected by direct fluorescence (green). Nuclei are stained with DAPI (blue).

Scale bar, 10  $\mu$ m.

**D)** WB analysis of MC38-EVs and EVs from ROSA<sup>mT/mG</sup> and LysM.Cre/ROSA<sup>mT/mG</sup> BMMs. One representative EV preparation per condition is shown.

**E)** Concentration and size distribution by NTA (mean  $\pm$  s.e.m.; n=3 acquisitions/sample) of EVs isolated from LysM.Cre/ROSA<sup>mT/mG</sup> and ROSA<sup>mT/mG</sup> BMMs. One representative EV preparation per condition is shown.

**F)** Representative TEM images of EVs from LysM.Cre/ROSA<sup>mT/mG</sup> BMMs. One representative EV preparation per condition is shown. Scale bar, 200 nm.

**G)** Flow cytometry analysis of EVs isolated from BMMs of WT, ROSA<sup>mT/mG</sup> and LysM.Cre/ROSA<sup>mT/mG</sup> mice. Representative dot plots show fluorescence of GFP and tdTomato.

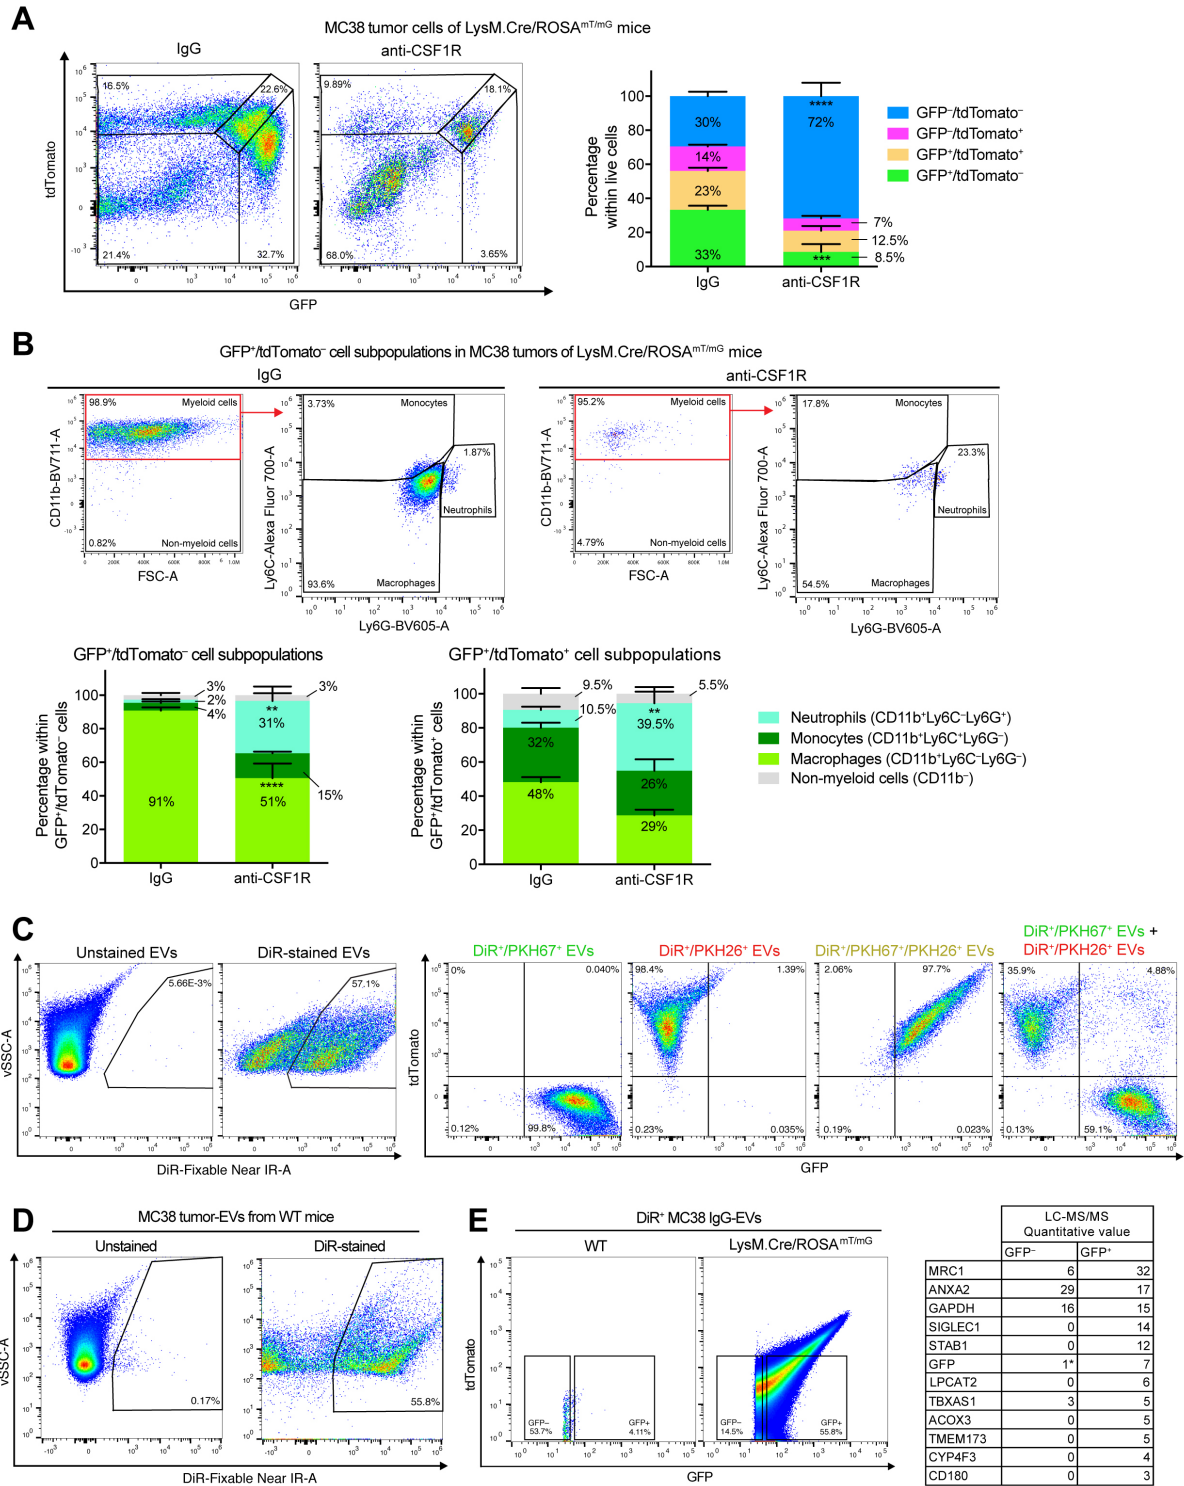

**Figure S4. MC38 tumor-derived cell populations in LysM.Cre/ROSA<sup>mT/mG</sup> mice and sorting of GFP<sup>+</sup> EVs, Related to Figure 4**

**A)** Flow cytometry analysis of MC38 tumor-derived cells of LysM.Cre/ROSA<sup>mT/mG</sup> mice treated with IgG or anti-CSF1R. Left panels show representative flow cytometry dot plots. Right panel shows quantitative percentage values (mean  $\pm$  s.e.m.; n=5 and 7 mice for IgG and anti-CSF1R, respectively). Statistics by two-way ANOVA, using Sidak's multiple comparison test.

**B)** Flow cytometry analysis of MC38 tumor-derived GFP<sup>+</sup> cells of LysM.Cre/ROSA<sup>mT/mG</sup> mice treated with IgG or anti-CSF1R. Top panels show representative flow cytometry dot plots. Bottom panels show quantitative percentage values (mean  $\pm$  s.e.m.; n=5 and 7 mice for IgG and anti-CSF1R, respectively). Statistics as in (A).

**C)** Flow cytometry analysis of IgG-EVs from MC38 tumors of WT mice. Representative plots show EVs

labeled with different combinations of three fluorescent membrane dyes (DiR, PKH67 and PKH26).

**D)** Gating strategy employed to identify DiR-labeled EVs in Figure 4C.

**E)** FACS sorting (dot plots on the left) and LC-MS/MS analysis (table on the right) of GFP<sup>+</sup> and GFP<sup>-</sup> EVs (1x10<sup>6</sup> each) from IgG-EVs of LysM.Cre/ROSA<sup>mT/mG</sup> mice.

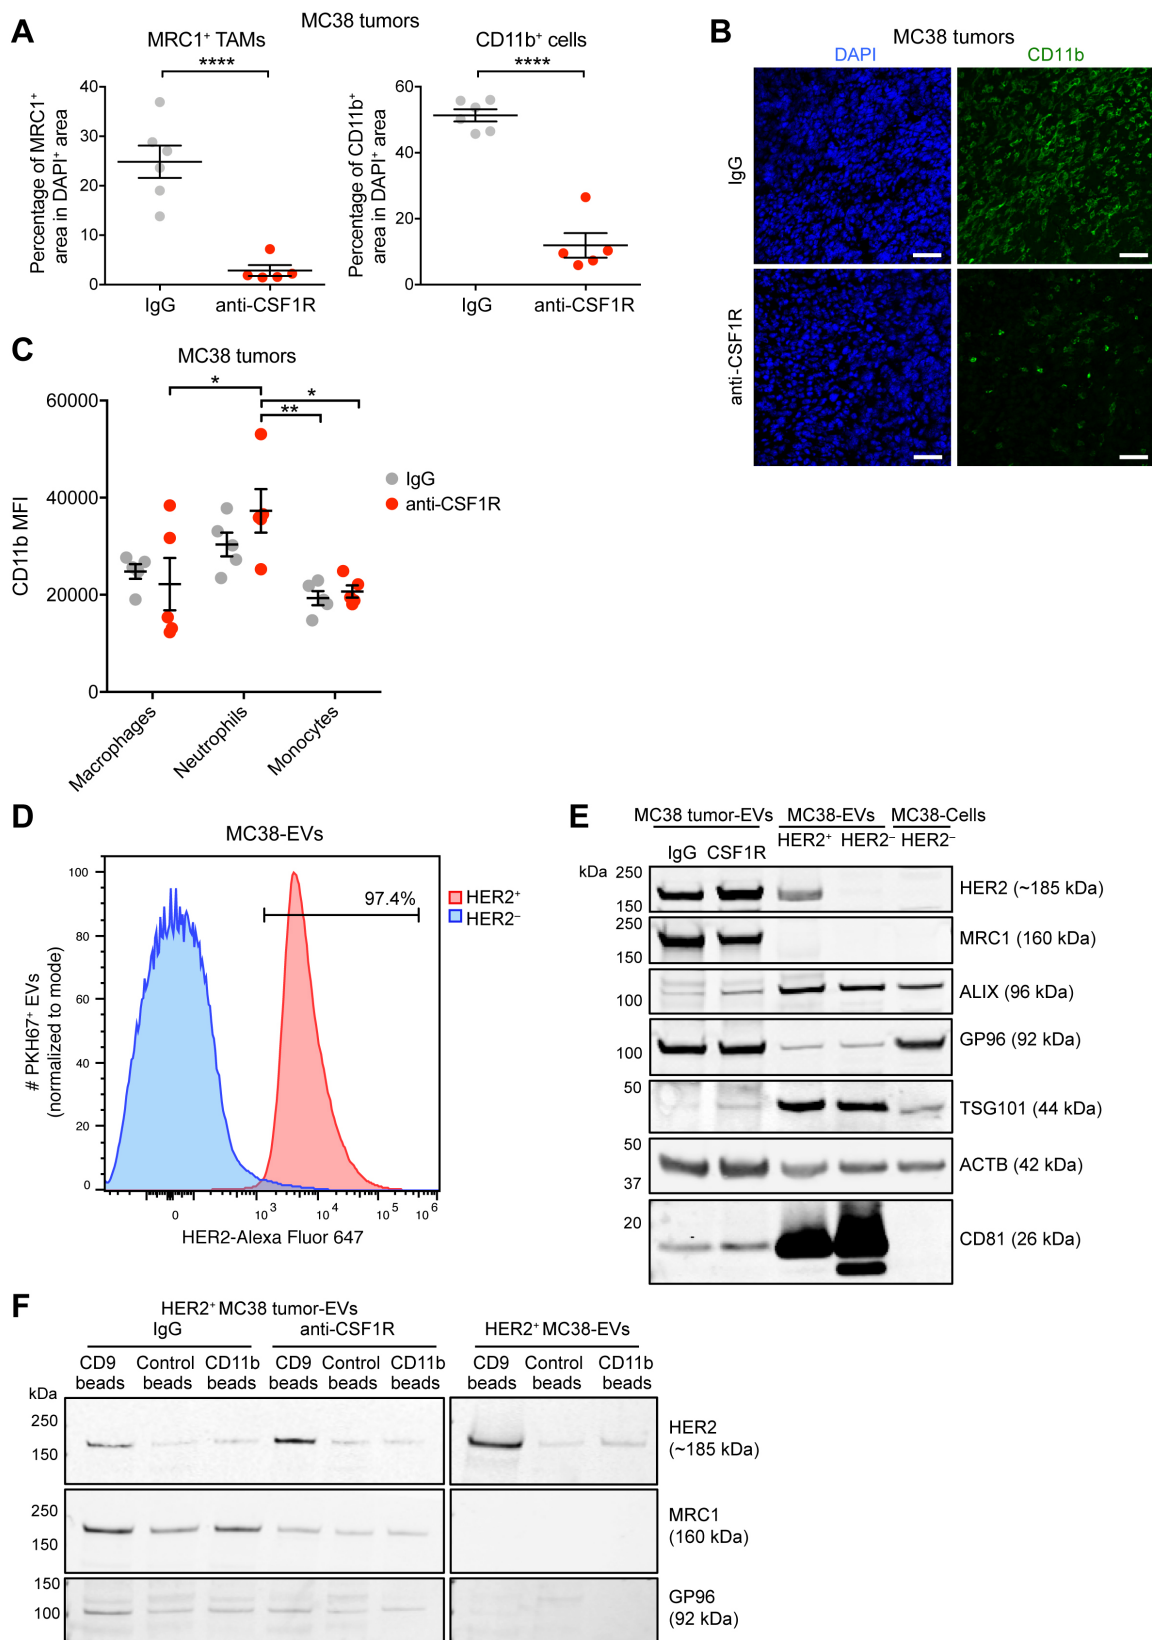

**Figure S5. Immunoprecipitation of CD11b<sup>+</sup> EVs from HER2<sup>+</sup> MC38 tumors, Related to Figure 4**

**A)** Immunostaining analysis on MC38 tumor sections from IgG- and anti-CSF1R-treated mice, shown as percentage of MRC1<sup>+</sup> or CD11b<sup>+</sup> area relative to DAPI<sup>+</sup> area (mean  $\pm$  s.e.m.; n=5-6 mice/condition; 5 randomly selected images per section). Statistics by unpaired two-tailed Student's t-test.

**B)** Representative images showing CD11b immunostaining of tumor sections from the experiment in (A).

Nuclei are stained with DAPI (blue). Scale bar, 50  $\mu$ m.

**C)** Flow cytometry analysis showing the median fluorescence intensity (MFI) of CD11b in the indicated myeloid cell types of MC38 tumors of IgG- or anti-CSF1R-treated mice (mean  $\pm$  s.e.m.; n=5 mice/condition). Statistics by two-way ANOVA, using Tukey's multiple comparison test.

**D)** Flow cytometry analysis of PKH67-labelled HER2<sup>+</sup> and HER2<sup>-</sup> MC38-EVs stained with an anti-HER2 antibody.

**E)** WB analysis of cultured MC38 cells, MC38-EVs, and HER2<sup>+</sup> MC38 tumor-derived IgG-EVs and anti-CSF1R-EVs. One EV preparation from a pool of 4 and 6 mice is shown for IgG and anti-CSF1R, respectively. HER2<sup>+</sup> MC38 tumors were grown in Wap-*ERBB2* mice. The experiment was performed once.

**F)** WB analysis of HER2<sup>+</sup> MC38-EVs and HER2<sup>+</sup> MC38 tumor-derived IgG-EVs and anti-CSF1R-EVs after immunoprecipitation with anti-CD9, anti-CD11b or control-coated magnetic beads. The experiment was performed once.



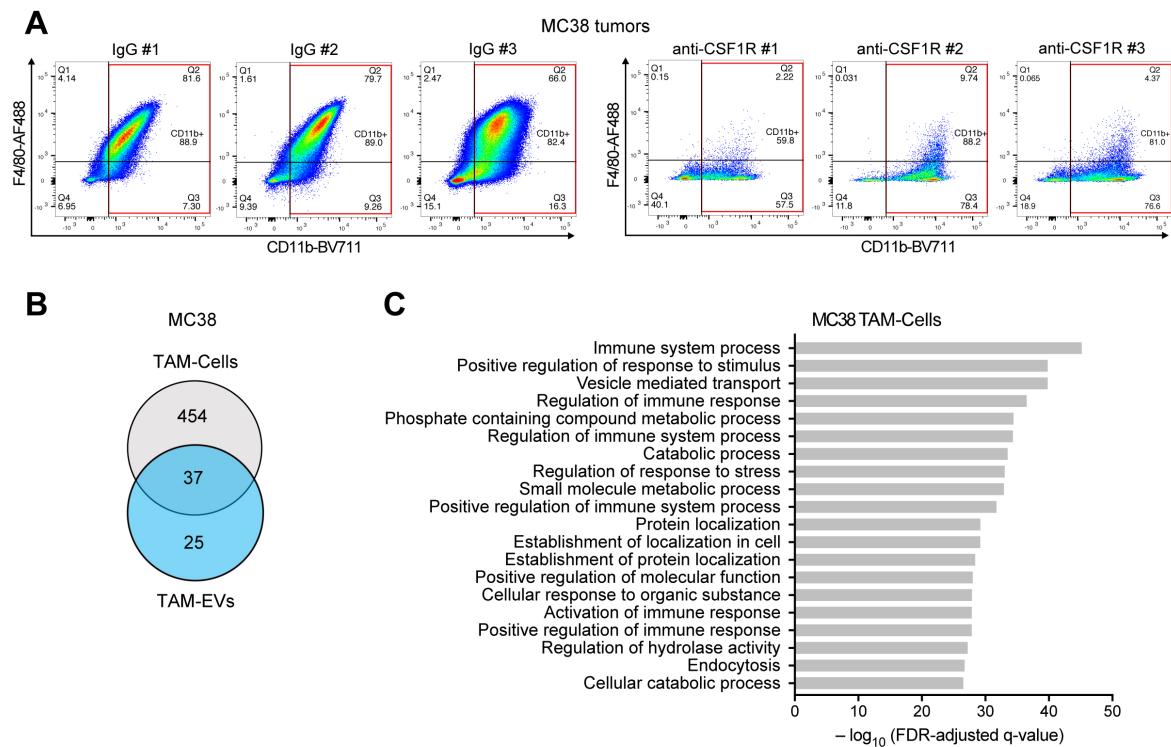

**Figure S6. Comparison between TAM-EV and TAM-Cell signatures, Related to Figure 4**

**A)** Flow cytometry of CD11b<sup>+</sup> cells in MC38 tumors of mice treated with IgG (left panels) or anti-CSF1R (right panels).

**B)** Venn diagram comparing proteins of the TAM-Cell and TAM-EV signatures. The TAM-Cell protein signature was determined by LC-MS/MS analysis of FACS-sorted CD11b<sup>+</sup> cells and selection of proteins enriched in IgG-Cell versus anti-CSF1R-Cell (criteria: IgG/anti-CSF1R FC>1.7; n=3 tumors/condition).

**C)** GO enrichment analysis of the TAM-Cell protein signature.



comparison test for all the other lipids.

**B)** LC-MS/MS-based concentration values of EPA and DHA in IgG-EVs and anti-CSF1R-EVs (mean  $\pm$  s.e.m.; n=4 independent EV isolations, each obtained after pooling several tumors). Statistics by multiple t-tests using Holm-Sidak's multiple comparison test.

**C)** LC-MS/MS-based relative quantification of eicosanoids detected in IgG-EVs and anti-CSF1R-EVs (mean  $\pm$  s.e.m.; n=4 independent EV isolations). Statistics as in (B).

**D)** Flow cytometry analysis of MC38 cells incubated for 24h with PKH67-labelled IgG-EVs or anti-CSF1R-EVs obtained from MC38 tumors. Data (mean  $\pm$  s.d.; n=3 independent cell cultures/condition) show percentage values of PKH67<sup>+</sup> cells (left panel) or median fluorescence intensity (MFI) of PKH67 (right panel). Statistics by one-way ANOVA, using Tukey's multiple comparison test.

**E)** WB analysis of MC38 cells incubated for 24h with IgG-EVs or anti-CSF1R-EVs from MC38 tumors. The absence of cleavage and activation of the apoptosis-related proteins PARP and CASP9 indicates lack of activation of apoptotic pathways. The experiment was performed once.
